# Supplementary material for: Pembrolizumab Induces an Unexpected Conformational Change in the CC′-loop of PD-1
Source: MDPI journal article supplement (doi:10.3390/cancers13010005), 2020-12-22
Supplement: s1 [file s1]

# 1 Supplementary material to

## 2 Pembrolizumab induces an unexpected

### 3 conformational change in the CC'-loop of PD-1

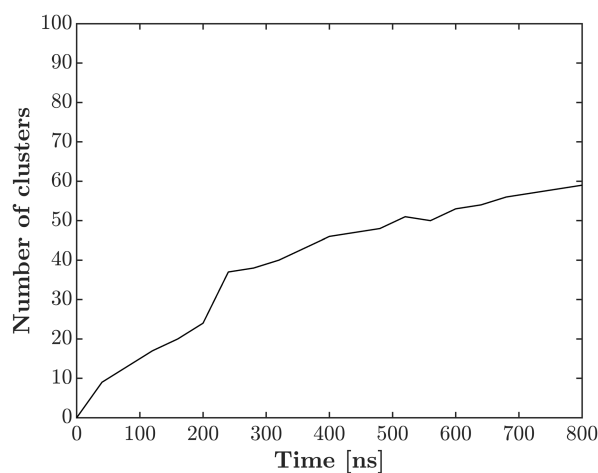

4 **Figure S1.** Number of clusters increasing with total simulation time. Daura clustering was  
5 performed over increasing portions (every 50 ns) of total simulation time (0-800 ns) of the four  
6 systems, PD-1<sub>Apo</sub>, PD-1<sub>PD-L1</sub> (red), PD-1<sub>Niv</sub> (blue) and PD-1<sub>Pem</sub>. First the number of clusters increases  
7 significantly and shows some levelling off later on, indicating that simulations have fairly  
8 converged.  
9
